# Supplementary material for: Development of novel monoclonal antibodies against CD109 overexpressed in human pancreatic cancer
Source: PubMed Central journal article supplement (PMC5929441; doi:10.18632/oncotarget.25017), 2018-04-13
Supplement: oncotarget-09-19994-s001.pdf [file oncotarget-09-19994-s001.pdf]

## Development of novel monoclonal antibodies against CD109 overexpressed in human pancreatic cancer

### SUPPLEMENTARY MATERIALS

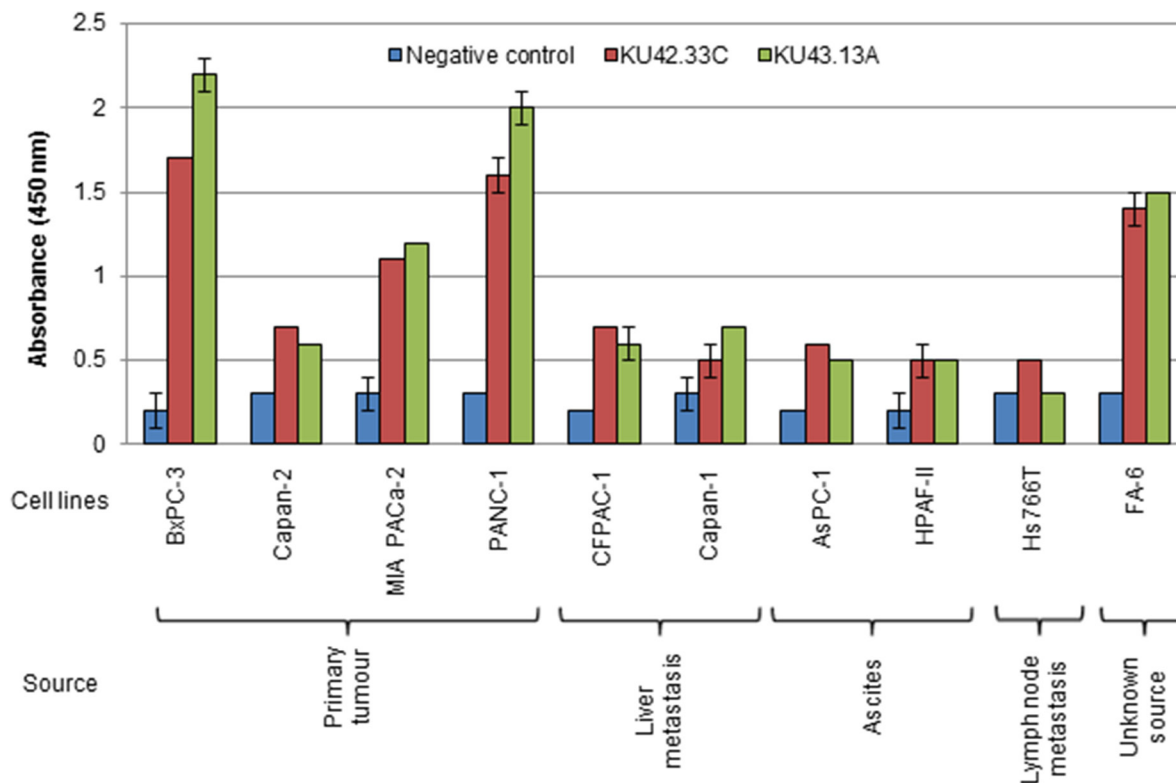

**Supplementary Figure 1: Expression level of the antigens recognised by novel mAbs KU42.33C and KU43.13A in a panel of human pancreatic cancer cell lines determined by ELISA. Results are presented as mean absorbance  $\pm$  SD.**

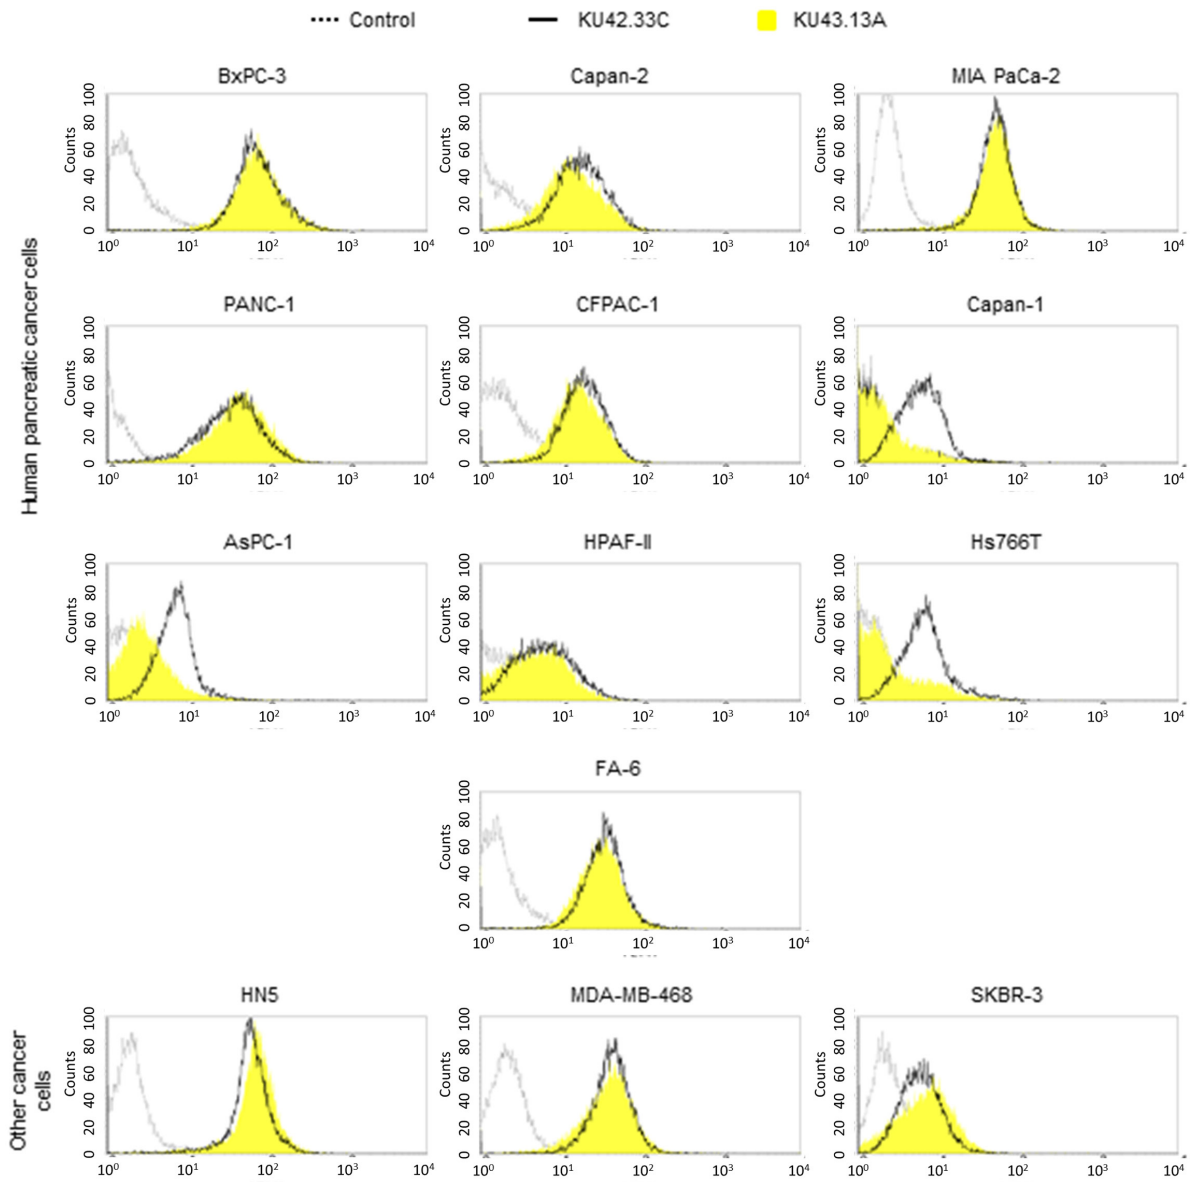

**Supplementary Figure 2: Expression level of the antigens recognised by novel mAbs KU42.33C and KU43.13A on human pancreatic cancer and other cancer cell lines, presented as histogram.**

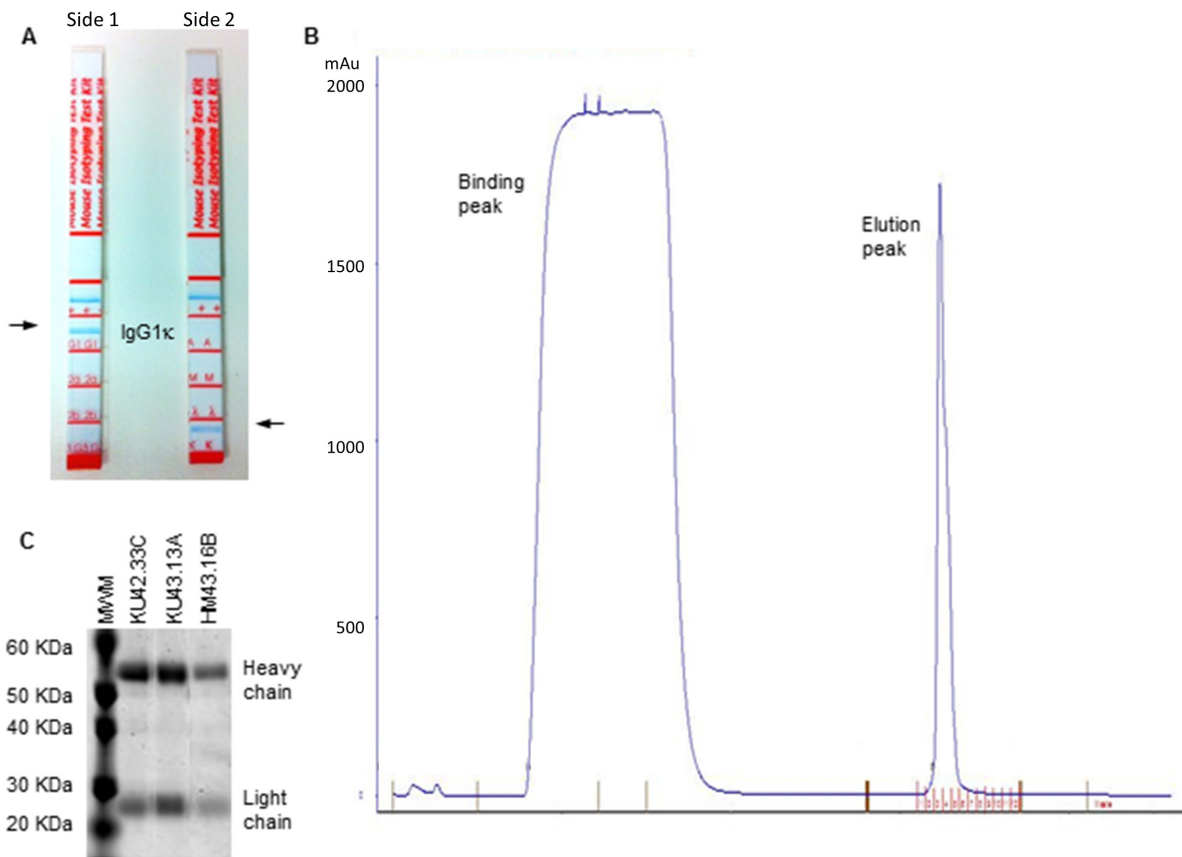

**Supplementary Figure 3: Purification of novel monoclonal antibodies.** (A) The isotype of mAb KU43.13A determined by mouse mAb Isotyping kit (AbD, Serotec). Top blue band represent the positive control. (B) Example of purification of mAb KU43.13A determined by HiTrap Protein G HP column in an ÄKTAprime plus chromatography system (both from GE Healthcare, UK). (C) Coomassie blue staining of purified monoclonal antibodies analysed by SDS-PAGE under reducing conditions. HM43.16B is a control mouse anti-EGFR IgG1 mAb. MWM: molecular weight marker.

**Supplementary Table 1: Patient characteristics, disease grade and staining intensity and distribution of pancreatic cancer samples in tissue microarray (Cat No. PA804a, Biomax US)**

See Supplementary File 1

**Supplementary Table 2: Patient characteristics and anatomic site of normal tissue microarray (Cat No. MNO661, Biomax US)**

| No. | Age | Sex | Anatomic site         | Scoring  |
|-----|-----|-----|-----------------------|----------|
| 1   | 37  | F   | Adrenal gland         | negative |
| 2   | 53  | M   | Bladder               | negative |
| 3   | 16  | M   | Bone marrow           | negative |
| 4   | 45  | F   | Eye                   | negative |
| 5   | 46  | F   | Breast                | negative |
| 6   | 58  | M   | Cerebellum            | negative |
| 7   | 58  | M   | Cerebral cortex       | negative |
| 8   | 38  | F   | Fallopian tube        | negative |
| 9   | 66  | M   | Esophagus             | negative |
| 10  | 53  | F   | Stomach               | negative |
| 11  | 47  | M   | Small intestine       | 1+       |
| 12  | 26  | M   | Colon                 | negative |
| 13  | 83  | M   | Rectum                | negative |
| 14  | 58  | M   | Heart                 | negative |
| 15  | 62  | M   | Kidney                | negative |
| 16  | 67  | F   | Liver                 | negative |
| 17  | 45  | F   | Lung                  | negative |
| 18  | 51  | F   | Ovary                 | 1+       |
| 19  | 35  | M   | Pancreas              | negative |
| 20  | 25  | M   | Parathyroid (adenoma) | negative |
| 21  | 58  | M   | Pituitary gland       | negative |
| 22  | 38  | F   | Placenta              | negative |
| 23  | 61  | M   | Prostate              | negative |
| 24  | 58  | M   | Skin                  | negative |
| 25  | 1   | F   | Spinal cord           | negative |
| 26  | 70  | M   | Spleen                | negative |
| 27  | 46  | M   | Striated muscle       | negative |
| 28  | 70  | M   | Testis                | negative |
| 29  | 15  | F   | Thymus                | negative |
| 30  | 29  | F   | Thyroid               | negative |
| 31  | 6   | F   | Tonsil                | negative |
| 32  | 47  | F   | Uterine cervix        | negative |
| 33  | 41  | F   | Endometrium           | negative |
